# Supplementary material for: Facile, High Quality Sequencing of Bacterial Genomes from Small Amounts of DNA
Source: Hindawi journal article supplement (doi:10.1155/2014/434575), 2014-01-01
Supplement: f1 [file 434575.f1.pdf]

Figure S1. NEBNext work flow.

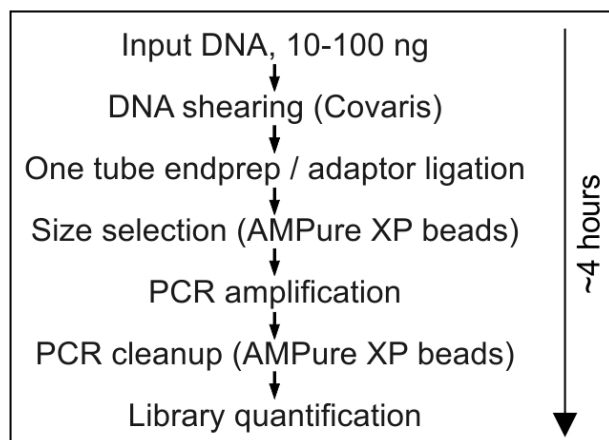

Table S1. Data statistics for all libraries.

| Organism                  | Library prep method | % GC | Starting DNA quantity, ng | PCR cycles | Library concentration, ng/uL | Average fragment size | Library concentration, nM | Total reads | Reads with quality >Q20 | Raw read length, bp | Total reads after trimming and normalization | Reads with quality >Q20 after trimming and normalization | Average read length after trimming, bp |
|---------------------------|---------------------|------|---------------------------|------------|------------------------------|-----------------------|---------------------------|-------------|-------------------------|---------------------|----------------------------------------------|----------------------------------------------------------|----------------------------------------|
| <i>B. anthracis</i>       | NEBNext             | 35.4 | 100                       | 8          | 14.6                         | 402                   | 55.0                      | 3,240,764   | 3,046,379               | 151                 | 2,459,460                                    | 2,352,017                                                | 148                                    |
| <i>E. coli</i>            | NEBNext             | 50.5 | 100                       | 8          | 11.5                         | 403                   | 43.0                      | 9,079,108   | 8,848,462               | 151                 | 2,520,000                                    | 2,457,774                                                | 151                                    |
| <i>B. thailandensis A</i> | NEBNext             | 67.6 | 10                        | 12         | 11.0                         | 373                   | 44.5                      | 8,446,330   | 7,277,554               | 151                 | 3,234,482                                    | 2,813,856                                                | 146                                    |
| <i>B. thailandensis A</i> | NEBNext             | 67.6 | 100                       | 10         | 46.5                         | 404                   | 174.4                     | 9,478,982   | 7,961,996               | 151                 | 3,168,918                                    | 2,689,132                                                | 148                                    |
| <i>B. thailandensis B</i> | NEBNext             | 67.6 | 10                        | 12         | 12.6                         | 383                   | 49.8                      | 7,722,232   | 6,594,365               | 151                 | 3,190,476                                    | 2,748,669                                                | 147                                    |
| <i>B. thailandensis B</i> | NEBNext             | 67.6 | 100                       | 10         | 47.6                         | 370                   | 194.9                     | 6,241,068   | 5,202,194               | 151                 | 3,142,858                                    | 2,665,947                                                | 147                                    |
| <i>B. anthracis</i>       | TruSeq              | 35.4 | 1000                      | 10         | 59.1                         | 248                   | 440.7                     | 47,836,056  | 19,122,933              | 151                 | 2,459,460                                    | 2,362,676                                                | 149                                    |
| <i>E. coli</i>            | TruSeq              | 50.5 | 1000                      | 10         | 59.4                         | 299                   | 237.2                     | 18,539,690  | 17,101,687              | 151                 | 2,571,428                                    | 2,393,342                                                | 147                                    |
| <i>B. thailandensis A</i> | TruSeq              | 67.6 | 1000                      | 10         | 55.4                         | 429                   | 80.3                      | 26,415,536  | 13,462,977              | 151                 | 3,147,652                                    | 2,104,314                                                | 149                                    |
| <i>B. thailandensis B</i> | TruSeq              | 67.6 | 1000                      | 10         | 39.9                         | 408                   | 40.3                      | 41,077,890  | 12,813,938              | 101                 | 4,690,000                                    | 2,881,288                                                | 101                                    |

Table 2a. Statistics for IDBA assemblies of Illumina short-insert data

| Sample             | Library Prep Kit | Starting DNA, µg | Short-insert coverage | # of contigs >1kb | # of contigs > 50kb | # of contigs > 100kb | N50 for contigs > 1kb (bp) | Largest contig (bp) | Smallest contig (bp) | Assembly Size (bp) |
|--------------------|------------------|------------------|-----------------------|-------------------|---------------------|----------------------|----------------------------|---------------------|----------------------|--------------------|
| B. anthracis       | Tru-Seq          | 1                | 69.0x                 | 46                | 25                  | 16                   | 256,006                    | 889,847             | 1,130                | 5,347,313          |
| B. anthracis       | NEBNext          | 0.1              | 70.0x                 | 48                | 25                  | 16                   | 256,006                    | 889,847             | 1,355                | 5,349,320          |
| E. coli            | Tru-Seq          | 1                | 61.2x                 | 207               | 33                  | 16                   | 88,517                     | 300,928             | 1,003                | 5,242,710          |
| E. coli            | NEBNext          | 0.1              | 70.4x                 | 199               | 35                  | 15                   | 88,517                     | 300,948             | 1,003                | 5,216,101          |
| B. thailandensis A | Tru-Seq          | 1                | 70.5x                 | 271               | 39                  | 8                    | 43,887                     | 160,378             | 1,001                | 6,582,658          |
| B. thailandensis A | NEBNext          | 0.1              | 70.3x                 | 117               | 50                  | 29                   | 121,177                    | 338,233             | 1,001                | 6,575,500          |
| B. thailandensis A | NEBNext          | 0.01             | 70.2x                 | 119               | 48                  | 27                   | 126,565                    | 338,233             | 1,001                | 6,575,406          |
| B. thailandensis B | Tru-Seq          | 1                | 70.6x                 | 281               | 35                  | 9                    | 44,682                     | 215,045             | 1,001                | 6,587,931          |
| B. thailandensis B | NEBNext          | 0.1              | 70.1x                 | 125               | 46                  | 22                   | 107,215                    | 432,614             | 1,001                | 6,579,749          |
| B. thailandensis B | NEBNext          | 0.01             | 69.1x                 | 129               | 40                  | 20                   | 113,254                    | 432,614             | 1,001                | 6,579,749          |

Table 2b. Statistics for Allpaths assemblies of Illumina short-insert data and 454 long-insert data

| Sample             | Library Prep Kit | Starting DNA, µg | Short-insert coverage | Long-insert coverage | Scaffolds | Number of contigs >1kb | Number of contigs > 50kb | Number of contigs > 100kb | N50 contigs > 1kb (bp) | Largest contig (bp) | Smallest contig (bp) | Assembly Size (bp) |
|--------------------|------------------|------------------|-----------------------|----------------------|-----------|------------------------|--------------------------|---------------------------|------------------------|---------------------|----------------------|--------------------|
| B. anthracis       | Tru-Seq          | 1                | 69.0x                 | 6.8x                 | 9         | 23                     | 14                       | 10                        | 831,258                | 2,508,405           | 5,048                | 5,348,296          |
| B. anthracis       | NEBNext          | 0.1              | 68.7x                 | 6.8x                 | 6         | 21                     | 13                       | 9                         | 996,207                | 2,306,221           | 5,048                | 5,358,817          |
| E. coli            | Tru-Seq          | 1                | 61.2x                 | 3.4x                 | 19        | 96                     | 29                       | 19                        | 148,132                | 384,555             | 1,045                | 5,269,849          |
| E. coli            | NEBNext          | 0.1              | 70.4x                 | 3.4x                 | 19        | 82                     | 30                       | 19                        | 180,092                | 625,412             | 1,012                | 5,312,046          |
| B. thailandensis A | Tru-Seq          | 1                | 70.5x                 | 7.9x                 | 8         | 77                     | 44                       | 23                        | 148,050                | 375,576             | 1,074                | 6,603,636          |
| B. thailandensis A | NEBNext          | 0.1              | 70.2x                 | 7.9x                 | 6         | 27                     | 18                       | 15                        | 559,003                | 1,096,991           | 1,548                | 6,650,888          |
| B. thailandensis A | NEBNext          | 0.01             | 70.3x                 | 7.9x                 | 4         | 26                     | 18                       | 14                        | 541,453                | 1,082,481           | 1,179                | 6,652,405          |
| B. thailandensis B | Tru-Seq          | 1                | 70.6x                 | 7.7x                 | 3         | 53                     | 35                       | 24                        | 206,108                | 575,396             | 2,863                | 6,655,446          |
| B. thailandensis B | NEBNext          | 0.1              | 69.2x                 | 7.5x                 | 4         | 27                     | 23                       | 21                        | 343,287                | 710,311             | 1,179                | 6,651,385          |
| B. thailandensis B | NEBNext          | 0.01             | 70.1x                 | 7.7x                 | 4         | 23                     | 17                       | 16                        | 559,910                | 924,997             | 1,897                | 6,660,010          |
